# Supplementary material
Source: HighWire-hosted journal article supplement (https://diabetes.diabetesjournals.org/content/suppl/2004/05/27/53.6.1609)
Supplement: Appendix.pdf [file Appendix.pdf]

TABLE A1

Clinical characteristics of affected subjects involved in linkage analysis of T2D and GIT studies

|                                            | T2D (n = 159) | GIT (n = 310) |
|--------------------------------------------|---------------|---------------|
| Male / Female                              | 68 / 91       | 131 / 179     |
| Diabetes (%)                               | 100           | 65            |
| History of diabetes (father / mother)* (%) |               |               |
| - / -                                      | 0             | 0             |
| - / unknown                                | 3             | 2             |
| unknown / -                                | 3             | 7             |
| + / -                                      | 3             | 3             |
| + / unknown                                | 12            | 16            |
| - / +                                      | 0             | 2             |
| unknown / +                                | 48            | 40            |
| + / +                                      | 30            | 30            |
| Age-at-examination (years)                 | 42 ± 9        | 42 ± 10       |
| Age-at-diagnosis <sup>†</sup> (years)      | 38 ± 9        | 38 ± 9        |
| Body mass index (kg/m <sup>2</sup> )       | 27.0 ± 4.6    | 26.1 ± 4.6    |
| Fasting glucose (mmol/l)                   | 8.2 ± 3.0     | 7.0 ± 2.7     |
| Fasting insulin (pmol/l)                   | 82 ± 68       | 77 ± 75       |
| Fasting C-peptide (pmol/l)                 | 613 ± 266     | 598 ± 321     |

Data are mean ± SD

\* Parental history was assessed for proband. Families with unknown affection status for both parents were excluded. (+: affected; -: unaffected)

<sup>†</sup> for diabetic patients only

TABLE A2

Multipoint linkage analysis for T2D

| <b>Marker</b>       | <b>Location (cM from pter)</b> | <b>LOD score</b> |
|---------------------|--------------------------------|------------------|
| <b>Chromosome 1</b> |                                |                  |
| D1S468              | 4.2                            | 0                |
| D1S548              | 15.1                           | 0                |
| D1S1597             | 29.9                           | 0                |
| D1S3669             | 37.1                           | 0                |
| D1S3720             | 46.6                           | 0.42             |
| ATA79C10            | 62.7                           | 0.01             |
| D1S3721             | 72.6                           | 0                |
| D1S2134             | 75.7                           | 0.05             |
| D1S1150             | 85.7                           | 0.01             |
| D1S1596             | 89.5                           | 0.11             |
| D1S1665             | 102.0                          | 0.02             |
| D1S1728             | 109.0                          | 0                |
| D1S551              | 113.7                          | 0                |
| GATA124C08          | 129.4                          | 0                |
| GATA133A08          | 137.6                          | 0                |
| D1S1627             | 139.0                          | 0                |
| D1S453              | 150.0                          | 0.1              |
| D1S534              | 151.9                          | 0.21             |
| D1S305              | 159.3                          | 0.94             |
| D1S1653             | 164.1                          | 2.15             |
| APOA2               | 170.8                          | 2.87             |
| D1S194              | 178.4                          | 2.45             |
| D1S196              | 181.5                          | 1.72             |
| D1S431              | 182.4                          | 1.53             |
| D1S210              | 188.9                          | 1.14             |
| D1S1589             | 192.1                          | 1.17             |
| D1S518              | 202.2                          | 0.89             |
| D1S1660             | 212.4                          | 0.66             |
| GATA124F08          | 226.0                          | 0.53             |
| D1S549              | 239.7                          | 0.08             |
| D1S3462             | 247.2                          | 0                |
| D1S1594             | 265.5                          | 0                |
| D1S1609             | 274.3                          | 0                |
| D1S2682             | 288.3                          | 0                |
| <b>Chromosome 2</b> |                                |                  |
| TPO                 | 0                              | 0.59             |

|                     |       |      |
|---------------------|-------|------|
| D2S1780             | 10.0  | 0.39 |
| D2S2952             | 17.9  | 0.44 |
| D2S1400             | 27.6  | 0.42 |
| D2S1360             | 38.3  | 0.16 |
| D2S405              | 48.0  | 0    |
| D2S1788             | 55.5  | 0    |
| D2S1356             | 64.3  | 0    |
| D2S1364             | 78.0  | 0    |
| D2S441              | 87.0  | 0    |
| D2S1394             | 90.8  | 0    |
| D2S1790             | 103.0 | 0    |
| D2S2972             | 114.4 | 0    |
| D2S1328             | 132.6 | 0.15 |
| D2S1334             | 145.1 | 0    |
| D2S1353             | 164.5 | 0.02 |
| D2S1776             | 173.0 | 0.01 |
| D2S1391             | 186.2 | 0    |
| D2S1384             | 200.4 | 0.1  |
| D2S2944             | 210.4 | 0    |
| D2S434              | 215.8 | 0    |
| D2S1363             | 227.0 | 0    |
| D2S427              | 236.7 | 0    |
| D2S2968             | 251.9 | 0    |
| D2S125              | 260.6 | 0    |
| D2S2986             | 264.5 | 0.06 |
| <b>Chromosome 3</b> |       |      |
| D3S2387             | 5.5   | 0.97 |
| D3S3630             | 10.7  | 0.72 |
| D3S1560             | 19.0  | 0.53 |
| D3S4545             | 26.3  | 1.27 |
| D3S2403             | 37.2  | 0.71 |
| D3S3038             | 44.8  | 0.52 |
| D3S2432             | 57.9  | 0.01 |
| D3S1768             | 61.5  | 0.02 |
| D3S2409             | 70.6  | 0    |
| D3S1766             | 78.6  | 0    |
| D3S3644             | 91.2  | 0    |
| D3S3039             | 103.7 | 0    |
| D3S4529             | 112.4 | 0    |
| D3S3045             | 124.2 | 0    |
| D3S2460             | 134.6 | 0    |

|         |       |   |
|---------|-------|---|
| D3S4523 | 138.0 | 0 |
| D3S1764 | 152.6 | 0 |
| D3S1744 | 161.0 | 0 |
| D3S1746 | 169.6 | 0 |
| D3S1763 | 176.5 | 0 |
| D3S3041 | 188.3 | 0 |
| D3S1262 | 201.1 | 0 |
| D3S2418 | 215.8 | 0 |
| D3S1311 | 224.9 | 0 |

**Chromosome 4**

|           |       |      |
|-----------|-------|------|
| D4S3360   | 0     | 0.27 |
| D4S2366   | 12.9  | 0.4  |
| D4S403    | 25.9  | 0.33 |
| GATA70E01 | 35.0  | 0.31 |
| D4S2397   | 42.7  | 0.11 |
| D4S2632   | 51.0  | 0    |
| D4S1627   | 60.2  | 0    |
| D4S3248   | 72.5  | 0.01 |
| D4S2367   | 78.4  | 0.05 |
| D4S3243   | 88.0  | 0.07 |
| D4S2361   | 93.5  | 0.22 |
| D4S1647   | 104.9 | 0.66 |
| D4S2623   | 114.0 | 1.28 |
| D4S2394   | 130.0 | 2.41 |
| D4S1644   | 143.3 | 1.79 |
| D4S1625   | 146.0 | 0.92 |
| D4S1629   | 158.0 | 0.08 |
| D4S2368   | 167.6 | 0.07 |
| D4S2417   | 181.9 | 0.08 |
| D4S171    | 199.9 | 0.01 |
| D4S1652   | 208.1 | 0    |

**Chromosome 5**

|         |      |      |
|---------|------|------|
| D5S2488 | 0    | 0.05 |
| D5S2849 | 7.8  | 0.12 |
| D5S2505 | 14.3 | 0.23 |
| D5S1486 | 21.1 | 0.03 |
| D5S2845 | 36.3 | 0.17 |
| D5S1470 | 45.3 | 0.06 |
| D5S1457 | 59.3 | 0.43 |
| D5S2500 | 69.2 | 0.03 |
| D5S1501 | 85.3 | 0.04 |

|          |       |      |
|----------|-------|------|
| D5S1725  | 97.8  | 0.14 |
| D5S1462  | 105.3 | 0.61 |
| D5S2501  | 117.0 | 0.15 |
| D5S1505  | 129.8 | 0.04 |
| D5S816   | 139.3 | 0.84 |
| D5S812   | 150.3 | 0.26 |
| D5S820   | 159.8 | 0.01 |
| D5S1456  | 174.8 | 0.36 |
| D5S211   | 182.9 | 0.15 |
| ATA52D02 | 189.2 | 0.16 |

**Chromosome 6**

|            |       |      |
|------------|-------|------|
| D6S942     | 0     | 0    |
| F13A1      | 9.2   | 0    |
| D6S1006    | 26.7  | 0    |
| D6S1281    | 44.4  | 0    |
| D6S1051    | 50.8  | 0    |
| D6S1017    | 63.3  | 0    |
| D6S2410    | 73.1  | 0    |
| D6S1031    | 88.6  | 0    |
| D6S1056    | 102.8 | 0    |
| D6S1021    | 112.2 | 0    |
| D6S474     | 118.6 | 0    |
| D6S1040    | 128.9 | 0    |
| D6S1009    | 137.7 | 0    |
| GATA184A08 | 146.1 | 0.44 |
| D6S305     | 166.4 | 1.14 |
| D6S1277    | 173.3 | 1.72 |
| D6S1027    | 187.2 | 1.58 |
| D6S2522    | 193.1 | 1.63 |

**Chromosome 7**

|         |      |      |
|---------|------|------|
| D7S3056 | 7.4  | 0.06 |
| D7S3047 | 17.2 | 0    |
| D7S3051 | 29.3 | 0    |
| D7S1802 | 33.0 | 0    |
| D7S1808 | 41.7 | 0    |
| D7S817  | 50.3 | 0    |
| D7S2846 | 57.8 | 0    |
| D7S1818 | 69.6 | 0    |
| D7S3046 | 78.7 | 0    |
| D7S2204 | 91.0 | 0    |
| D7S820  | 98.4 | 0    |

|                     |       |      |
|---------------------|-------|------|
| D7S821              | 109.1 | 0    |
| D7S1799             | 113.9 | 0    |
| D7S1817             | 121.4 | 0    |
| D7S3061             | 128.4 | 0    |
| D7S1804             | 137.0 | 0    |
| GATA104             | 155.1 | 0    |
| D7S3070             | 163.0 | 0    |
| D7S3058             | 173.7 | 0    |
| D7S559              | 182.0 | 0    |
| <b>Chromosome 8</b> |       |      |
| D8S262              | 4.3   | 0    |
| D8S503              | 16.2  | 0.02 |
| D8S1130             | 22.4  | 0.01 |
| D8S1106             | 26.4  | 0.03 |
| D8S261              | 37.0  | 0    |
| D8S560              | 43.4  | 0.15 |
| D8S1048             | 54.3  | 0.16 |
| D8S1110             | 67.3  | 0    |
| D8S1136             | 82.3  | 0    |
| D8S2324             | 94.1  | 0    |
| GATA8B01            | 103.7 | 0.16 |
| GAAT1A4             | 110.2 | 0    |
| D8S1132             | 119.0 | 0    |
| D8S592              | 125.3 | 0    |
| D8S1179             | 135.1 | 0    |
| D8S1108             | 154.0 | 0.24 |
| D8S373              | 164.5 | 0.36 |
| <b>Chromosome 9</b> |       |      |
| D9S1779             | 0     | 0    |
| D9S1871             | 8.4   | 0    |
| D9S2169             | 14.2  | 0    |
| GATA187D09          | 21.9  | 0    |
| D9S925              | 32.0  | 0    |
| D9S1121             | 44.3  | 0.07 |
| D9S1118             | 58.3  | 0.17 |
| D9S301              | 66.3  | 0    |
| D9S1122             | 75.9  | 0.06 |
| D9S922              | 80.3  | 0    |
| D9S252              | 88.9  | 0    |
| D9S910              | 104.5 | 0    |
| D9S930              | 120.0 | 0    |

|                      |       |      |
|----------------------|-------|------|
| D9S934               | 128.0 | 0    |
| D9S1825              | 136.5 | 0    |
| D9S164               | 147.9 | 0    |
| D9S1838              | 163.8 | 0.07 |
| <b>Chromosome 10</b> |       |      |
| D10S1435             | 4.0   | 0    |
| D10S189              | 19.0  | 0    |
| D10S1412             | 28.3  | 0    |
| D10S1430             | 33.2  | 0    |
| D10S1423             | 46.0  | 0    |
| D10S1426             | 59.0  | 0    |
| D10S1220             | 70.2  | 0    |
| D10S1225             | 80.8  | 0    |
| GATA121A08           | 88.4  | 0    |
| D10S1432             | 93.9  | 0    |
| D10S2327             | 100.9 | 0    |
| D10S2470             | 112.6 | 0    |
| D10S1239             | 125.0 | 0.01 |
| ATA103C06            | 134.2 | 0.03 |
| D10S1425             | 136.7 | 0.07 |
| D10S1230             | 142.8 | 0.02 |
| D10S1213             | 148.2 | 0    |
| D10S1222             | 156.3 | 0.14 |
| D10S212              | 170.9 | 0.52 |
| <b>Chromosome 11</b> |       |      |
| D11S1984             | 2.1   | 0.18 |
| D11S2362             | 8.9   | 0.35 |
| D11S1999             | 17.2  | 0    |
| D11S1981             | 21.5  | 0    |
| ATA34E08             | 33.0  | 0.03 |
| D11S1392             | 43.2  | 0.19 |
| D11S2365             | 58.0  | 0.03 |
| D11S4459             | 58.2  | 0.01 |
| D11S2363             | 58.4  | 0.01 |
| D11S2006             | 59.2  | 0.01 |
| D11S2371             | 76.1  | 0    |
| D11S2002             | 85.5  | 0    |
| D11S1995             | 93.1  | 0    |
| D11S1998             | 113.1 | 0    |
| D11S4464             | 123.0 | 0    |
| D11S912              | 131.3 | 0    |

|                      |       |      |
|----------------------|-------|------|
| D11S1304             | 141.9 | 0.03 |
| D11S969              | 146.6 | 0.03 |
| <b>Chromosome 12</b> |       |      |
| D12S372              | 6.4   | 0.15 |
| GATA49D12            | 17.7  | 0.12 |
| D12S269              | 30.3  | 0.47 |
| D12S1042             | 48.7  | 1.99 |
| D12S1301             | 56.3  | 0.89 |
| D12S390              | 67.6  | 1.15 |
| D12S1294             | 78.0  | 0.15 |
| D12S1052             | 83.2  | 0.26 |
| D12S1064             | 95.0  | 0    |
| D12S1300             | 104.0 | 0    |
| PAH                  | 109.5 | 0    |
| D12S2070             | 125.3 | 0.04 |
| D12S395              | 136.8 | 0    |
| D12S2078             | 150.0 | 0.06 |
| D12S1045             | 160.7 | 0    |
| D12S1638             | 168.8 | 0.19 |
| <b>Chromosome 13</b> |       |      |
| D13S787              | 8.9   | 0    |
| ATA5A09              | 20.4  | 0    |
| D13S1493             | 25.8  | 0    |
| D13S894              | 33.0  | 0.19 |
| D13S1807             | 47.2  | 0.01 |
| D13S800              | 55.3  | 0.02 |
| D13S317              | 63.9  | 0.42 |
| D13S793              | 76.0  | 0    |
| D13S779              | 82.9  | 0    |
| D13S796              | 93.5  | 0.06 |
| D13S285              | 105.6 | 0.3  |
| <b>Chromosome 14</b> |       |      |
| D14S742              | 12.5  | 0    |
| D14S1280             | 25.9  | 0    |
| D14S608              | 28.0  | 0    |
| D14S599              | 40.7  | 0    |
| D14S747              | 55.8  | 0    |
| D14S52               | 57.4  | 0    |
| D14S592              | 66.8  | 0    |
| D14S588              | 75.6  | 0    |
| D14S606              | 91.6  | 0    |

|                      |       |      |
|----------------------|-------|------|
| GATA193A07           | 95.9  | 0    |
| D14S1434             | 113.2 | 0    |
| D14S1426             | 125.9 | 0.03 |
| D14S1007             | 138.2 | 0    |
| <b>Chromosome 15</b> |       |      |
| D15S128              | 6.1   | 0.15 |
| D15S822              | 12.3  | 0.05 |
| D15S165              | 20.2  | 0.11 |
| GATA50C03            | 34.8  | 0.48 |
| D15S659              | 43.5  | 0.07 |
| D15S643              | 52.3  | 0.02 |
| D15S1507             | 60.2  | 0.04 |
| D15S818              | 71.8  | 0.02 |
| D15S652              | 90.0  | 0.12 |
| D15S816              | 100.6 | 0.03 |
| D15S1515             | 109.3 | 0    |
| D15S87               | 115.9 | 0    |
| <b>Chromosome 16</b> |       |      |
| D16S3401             | 0     | 0    |
| D16S2616             | 11.5  | 0    |
| D16S748              | 22.7  | 0    |
| D16S764              | 30.0  | 0.02 |
| D16S403              | 43.9  | 0    |
| D16S769              | 50.6  | 0    |
| D16S753              | 57.8  | 0    |
| D16S3396             | 63.8  | 0    |
| D16S3253             | 71.8  | 0    |
| GATA138C05           | 81.2  | 0    |
| D16S2624             | 87.6  | 0    |
| D16S516              | 100.4 | 0.03 |
| D16S422              | 111.1 | 0.01 |
| D16S539              | 124.7 | 0    |
| D16S2621             | 130.4 | 0.02 |
| <b>Chromosome 17</b> |       |      |
| D17S1308             | 0.6   | 0    |
| D17S1298             | 10.7  | 0.34 |
| D17S974              | 22.2  | 0.06 |
| ATA78D02             | 32.0  | 0    |
| D17S2196             | 44.6  | 0    |
| D17S1299             | 62.0  | 0    |
| D17S2180             | 66.9  | 0    |

|          |       |      |
|----------|-------|------|
| D17S1290 | 82.0  | 0    |
| D17S2193 | 89.3  | 0    |
| D17S1301 | 100.0 | 0.01 |
| D17S784  | 116.9 | 0    |
| D17S928  | 126.5 | 0    |

**Chromosome 18**

|            |       |      |
|------------|-------|------|
| GATA178F11 | 2.8   | 0.1  |
| D18S1370   | 6.9   | 0.15 |
| D18S391    | 18.7  | 0.64 |
| D18S843    | 28.1  | 1    |
| D18S71     | 43.5  | 0.21 |
| D18S877    | 54.4  | 0    |
| D18S535    | 64.5  | 0.01 |
| D18S851    | 75.0  | 0    |
| D18S858    | 80.4  | 0.1  |
| D18S1357   | 88.6  | 0.02 |
| D18S1371   | 115.9 | 0    |
| D18S70     | 126.0 | 0    |

**Chromosome 19**

|          |       |      |
|----------|-------|------|
| D19S591  | 9.8   | 0    |
| D19S1034 | 20.8  | 0    |
| D19S586  | 32.9  | 0    |
| D19S714  | 42.0  | 0    |
| D19S245  | 58.7  | 0    |
| D19S559  | 68.1  | 0    |
| D19S246  | 78.1  | 0    |
| D19S589  | 87.7  | 0.11 |
| D19S254  | 100.6 | 0.01 |

**Chromosome 20**

|          |       |   |
|----------|-------|---|
| D20S103  | 2.1   | 0 |
| D20S482  | 12.0  | 0 |
| D20S95   | 16.7  | 0 |
| D20S851  | 24.7  | 0 |
| D20S1143 | 35.5  | 0 |
| D20S477  | 48.0  | 0 |
| D20S478  | 54.1  | 0 |
| D20S481  | 62.3  | 0 |
| D20S480  | 79.9  | 0 |
| D20S451  | 90.1  | 0 |
| D20S164  | 101.2 | 0 |

**Chromosome 21**

|                      |      |      |
|----------------------|------|------|
| D21S1432             | 3.0  | 0    |
| D21S1437             | 13.1 | 0.03 |
| D21S1270             | 27.4 | 0.13 |
| D21S1440             | 36.8 | 0.19 |
| D21S1411             | 51.5 | 0.49 |
| <b>Chromosome 22</b> |      |      |
| GATA198B05           | 1.8  | 0.13 |
| D22S686              | 13.6 | 0.04 |
| D22S689              | 28.6 | 0    |
| D22S1045             | 42.8 | 0    |
| D22S532              | 52.6 | 0    |
| D22S1169             | 60.6 | 0    |

---

TABLE A3

Family structure in T2D (64 families) and GIT (102 families) studies

|                                                                         | T2D Study  | GIT Study  |
|-------------------------------------------------------------------------|------------|------------|
| Number of subjects with                                                 |            |            |
| NGT (%)                                                                 | 161 (40.1) | 245 (40.4) |
| IGT/IFG (%)                                                             | 49 (12.2)  | 117 (19.3) |
| T2D (%)                                                                 | 191 (47.6) | 245 (40.4) |
| Number of members per family*                                           | 6.3 ± 2.6  | 6.0 ± 2.5  |
| Number of affected members per family<br>included in linkage analysis * | 2.5 ± 0.7  | 3.0 ± 1.1  |

NGT, normal glucose tolerance; IGT, impaired glucose tolerance; IFG, impaired fasting glucose; and T2D, type 2 diabetes (20).

\*mean ± SD

TABLE A4

Numbers of possible relative pairs in linkage studies for T2D and GIT

| Relative pair          | Number of possible pairs*  |                             |
|------------------------|----------------------------|-----------------------------|
|                        | T2D Study<br>(64 families) | GIT Study<br>(102 families) |
| Full-siblings †        | 126                        | 306                         |
| Half-siblings          | 0                          | 5                           |
| Grandparent-grandchild | 0                          | 6                           |
| Avuncular              | 3                          | 30                          |
| First cousins          | 1                          | 5                           |
| Total                  | 130                        | 352                         |

\* There were 77 and 159 parent-offspring pairs for T2D and GIT studies respectively. These pairs are not informative for non-parametric linkage analysis.

† For T2D study, there were 39, 19 and 5 families with 1, 3 and 6 possible full sibpairs, respectively. For GIT study, there were 46, 32, 1, 13, 1, 6 and 1 families with 1, 3, 4, 6, 7, 10 and 15 possible full sibpairs, respectively
